# Supplementary material
Source: PubMed Central journal article supplement (PMC9067365)
Supplement: NIHMS1802188-supplement-suppl1.pdf [file NIHMS1802188-supplement-suppl1.pdf]

**Table S1.** Genetic variations detected in the full-length *ERMAP* gene of the family

| Location         | Nucleotide Change* | dbSNP reference no.    | Protein residue change† | Franklin classification‡ | Zygosity   |                   |              |
|------------------|--------------------|------------------------|-------------------------|--------------------------|------------|-------------------|--------------|
|                  |                    |                        |                         |                          | Patient    | Sister 1/Sister 2 |              |
| Intron 1         | c.-121-795T>C      | rs6600425              | NA                      | Benign                   | Homozygous | Homozygous        |              |
| Intron 2         | c.-6+1397G>A       | rs6658001              | NA                      | Benign                   | NO         | Heterozygous      |              |
|                  | c.-6+1564T>G       | Novel                  | NA                      | VUS                      | NO         | Heterozygous      |              |
|                  | c.-6+1835C>A       | rs1471747              | NA                      | Benign                   | Homozygous | Homozygous        |              |
| Intron 3         | c.86-85G>T         | rs12727498             | NA                      | Benign                   | NO         | Heterozygous      |              |
|                  | c.424C>G           | Novel                  | Gln142Glu               | VUS                      | Homozygous | Heterozygous      |              |
| Exon 4§          | c.433+993T>C       | rs34721801             | NA                      | Benign                   | Homozygous | Heterozygous      |              |
|                  | c.433+1239A>G      | rs11210725             | NA                      | Benign                   | Homozygous | Homozygous        |              |
|                  | c.433+1281T>C      | rs11580112             | NA                      | Benign                   | NO         | Heterozygous      |              |
|                  | c.433+1548A>G      | rs10789427             | NA                      | Benign                   | Homozygous | Homozygous        |              |
|                  | c.433+1763A>G      | rs56161641             | NA                      | Benign                   | Homozygous | Homozygous        |              |
|                  | c.434-1588A>G      | rs11210726             | NA                      | Benign                   | Homozygous | Homozygous        |              |
|                  | c.434-1409G>A      | rs58724795             | NA                      | Benign                   | Homozygous | Heterozygous      |              |
|                  | c.434-1061G>A      | rs7548186              | NA                      | Benign                   | Homozygous | Homozygous        |              |
|                  | c.434-874T>C       | rs7540604              | NA                      | Benign                   | Homozygous | Homozygous        |              |
|                  | c.434-46T>C        | rs4660672              | NA                      | Benign                   | Homozygous | Homozygous        |              |
|                  | Intron 5           | c.550+96C>G            | rs4660673               | NA                       | Benign     | Homozygous        | Homozygous   |
|                  |                    | c.550+197_550+198delCC | rs59816087              | NA                       | Benign     | Homozygous        | Homozygous   |
|                  | Intron 7           | c.616+719C>T           | rs7522285               | NA                       | Benign     | NO                | Heterozygous |
|                  |                    | c.617-398C>A           | rs11210728              | NA                       | Benign     | NO                | Heterozygous |
| Intron 11        | c.712+250G>A       | rs1466549              | NA                      | Benign                   | NO         | Heterozygous      |              |
|                  | c.712+542T>C       | rs1237396071           | NA                      | VUS                      | Homozygous | Heterozygous      |              |
|                  | c.713-606A>G       | rs11210730             | NA                      | Benign                   | Homozygous | Homozygous        |              |
| Exon 12 (3' UTR) | c.*645G>A          | rs1484324              | NA                      | Benign                   | NO         | Heterozygous      |              |
|                  | c.*939G>C          | rs10789428             | NA                      | Benign                   | NO         | Heterozygous      |              |

\* relative to NCBI Reference Sequence NM\_001017922.1

† relative to NCBI Reference Sequence NP\_001017922.1

‡ VUS-variant of uncertain significance<sup>37</sup>

§ The patient and his 2 sisters were homozygous for the reference nucleotide “G” at position c.169 in exon 4 indicative of the SC:1 phenotype.

NA- Not available

NO- Not observed

**Table S2.** Genetic variations detected in the *RHCE* gene of the family

| Location | Nucleotide Change*          | dbSNP reference no. | Protein residue change† | Franklin classification | Zyosity    |                   |
|----------|-----------------------------|---------------------|-------------------------|-------------------------|------------|-------------------|
|          |                             |                     |                         |                         | Patient    | Sister 1/Sister 2 |
| Promoter | c.-378G>A                   | rs2281179           | NA                      | Benign                  | Homozygous | Homozygous        |
|          | c.-369C>T                   | rs2072933           | NA                      | Benign                  | Homozygous | Homozygous        |
|          | c.-296G>A                   | rs2072932           | NA                      | Benign                  | Homozygous | Homozygous        |
|          | c.-122C>A                   | rs2072931           | NA                      | Benign                  | Homozygous | Homozygous        |
| Intron 3 | c.486+157C>A                | rs28631635          | NA                      | Benign                  | Homozygous | Homozygous        |
| Intron 4 | c.635-435C>T                | rs607116            | NA                      | Benign                  | Homozygous | Homozygous        |
| Exon 5   | c.676G>C                    | rs609320            | Ala226Pro ("E")         | Benign                  | Homozygous | Homozygous        |
| Intron 5 | c.801+101G>A                | rs636889            | NA                      | Benign                  | Homozygous | Homozygous        |
|          | c.802-281G>T                | rs760938            | NA                      | Benign                  | Homozygous | Homozygous        |
| Intron 8 | c.1154-222_1154-221insAAATA | rs71014358          | NA                      | Benign                  | Homozygous | Homozygous        |

\* relative to NCBI Reference Sequence NM\_020485.4

† relative to NCBI Reference Sequence NP\_065231.3

NA- Not available

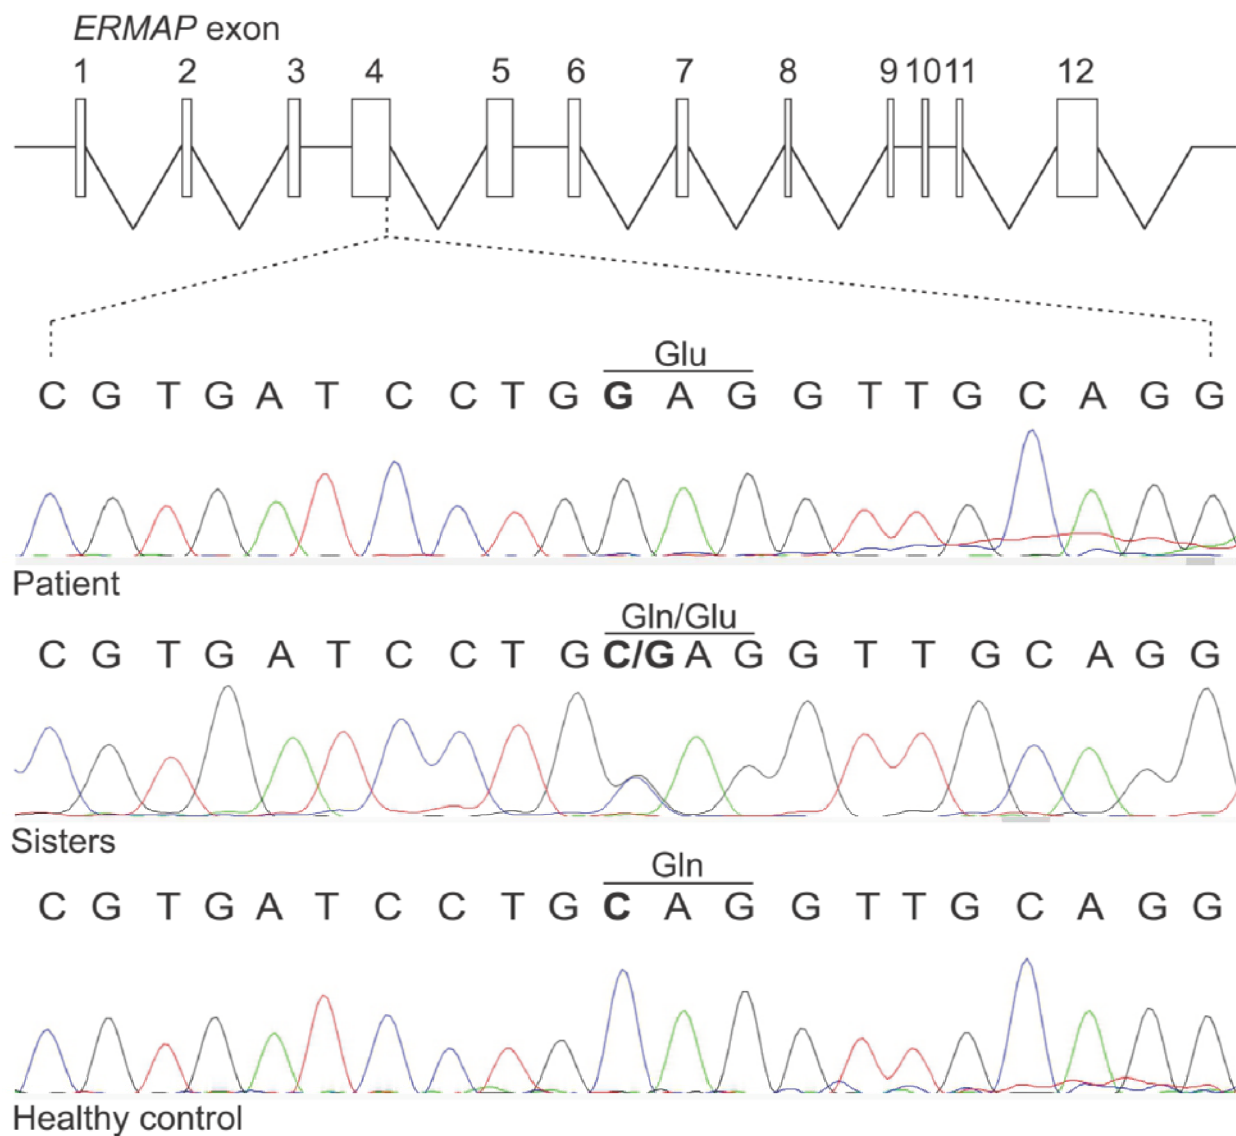

Fig. S1
